# Supplementary material
Source: PubMed Central journal article supplement (PMC6540810)
Supplement: NIHMS1525214-supplement-1.pdf [file NIHMS1525214-supplement-1.pdf]

## Supplemental Material

## Clinicaltrials.gov Search Methodology

The clinicaltrials.gov website was queried for all studies included in the disease state “atrial fibrillation,” and all available studies and columns were obtained. The following columns were included in the downloaded dataset:

"Rank", "NCT.Number", "Title", "Acronym", "Status", "Study.Results", "Conditions",  
"Interventions", "Outcome.Measures", "Sponsor.Collaborators", "Gender", "Age", "Phases",  
"Enrollment", "Funded.Bys", "Study.Type", "Study.Designs", "Other.IDs", "Start.Date",  
"Primary.Completion.Date", "Completion.Date", "First.Posted", "Results.First.Posted",  
"Last.Update.Posted", "Locations", "Study.Documents", "URL"

Downloaded entries for which “Atrial fibrillation” did not appear in the “Conditions” column were excluded.

A case-insensitive text search was performed in the “Outcomes Measures” field to identify terms that might suggest the use of patient reported outcomes (PROs). For generic PROs, these included the following:

“QoL”, “quality of life”, “SF-36”, “SF-8”, “SF-12”, “Short-Form”, “EQ5D”, “EQ-5D”, “EuroQol”,  
“(EQ)-5D”, “questionnaire”, “Depression”, “HDRS-17”, “MFI-20”, “Inventory”, “PHQ-9”,  
“HeartQoL”, “MLWHF”, “RAND-36”, “KCCQ”, “Visual analog scale”, “DASS”, “HUI-3”

The presence of any of the above terms was categorized as indication that the study intended to collect PROs.

Additionally, the following text search terms were used to identify AF-specific PROs:

"AFEQT", "AFSS", "MAFSI", "AF6", "PACT-", "ASTA", "AF-QoL", "SCL", "symptom checklist"

The identification of these was categorized as indication that the study reported collecting AF-specific PROs.

Abbreviations:

PRO: patient reported outcomes; AF: atrial fibrillation; QoL: quality of life; SF: Short-Form; HDRS-17: 17-item Hamilton Depression Rating Scale; MFI-20: Multidimensional Fatigue Inventory; QoL: quality of life; SF: Short-Form; Minnesota Living with Heart Failure questionnaire; KCCQ: Kansas City Cardiomyopathy Questionnaire; AFEQT: Atrial Fibrillation Effect on QualiTy-of-life; AFSS: Atrial fibrillation Symptom Score (University of Toronto); MAFSI: Mayo Atrial Fibrillation Symptom Inventory; PACT: Perception of Anticoagulant Treatment questionnaire; ASTA: Arrhythmia-Specific questionnaire in Tachycardia and Arrhythmia; SCL: symptom checklist.
